# Supplementary material for: Magnetoreception in fishes: the effect of magnetic pulses on orientation of juvenile Pacific salmon
Source: Oxford University Press journal article supplement (doi:10.1242/jeb.222091), 2020-01-01
Supplement: jeb222091supp.pdf [file jeb222091supp.pdf]

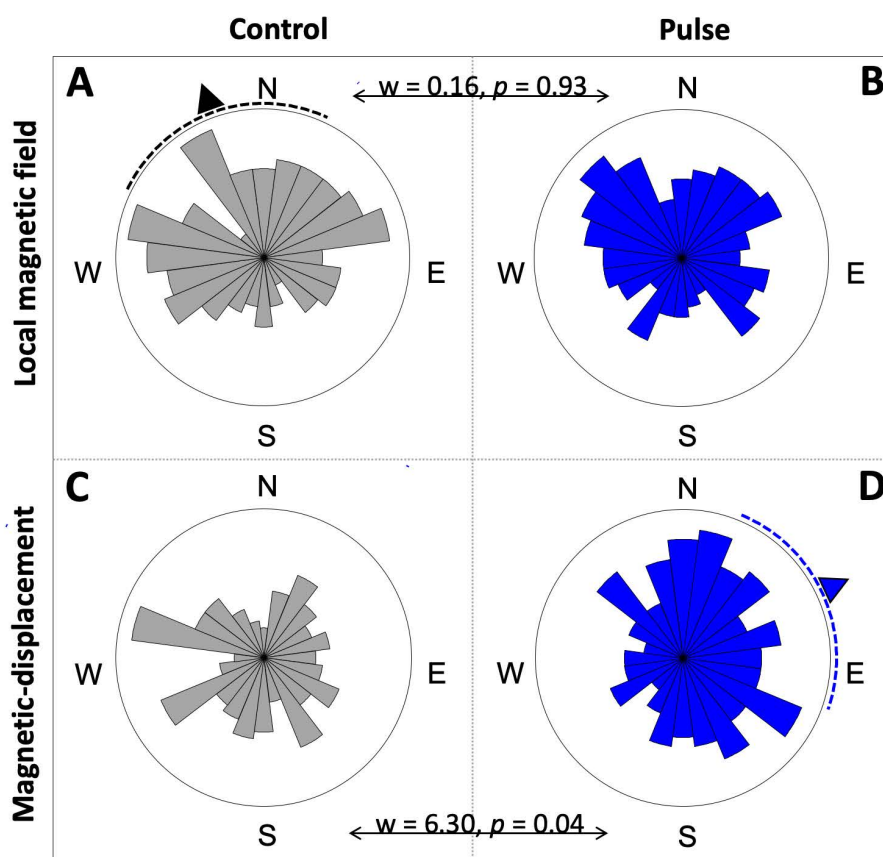

**Fig. S1. Analysis of data treating each fish as an independent data point.** (A) Under local magnetic field conditions fish from the control group were significantly oriented with a mean angle of 341 deg (Rayleigh test,  $n=208$ ,  $r=0.12$ ,  $z=3.20$ ,  $p=0.04$ ). (B) Under local magnetic field conditions salmon that experienced a strong magnetic pulse were not oriented as a group (Rayleigh test,  $n=196$ ,  $r=0.12$ ,  $z=2.78$ ,  $p=0.06$ ). (C) During a magnetic displacement to a southern ocean region, control fish were not oriented as a group (Rayleigh test,  $n=216$ ,  $r=0.06$ ,  $z=0.72$ ,  $p=0.49$ ). (D) During the magnetic displacement, salmon from the pulse group were significantly oriented with a mean angle of 66 deg (Rayleigh test,  $n=204$ ,  $r=0.13$ ,  $z=3.30$ ,  $p=0.04$ ). The length of each bar indicates the number of fish that were oriented within each 15 degree range of directions. Arrow heads indicate the mean direction of each treatment group. Dotted lines represent the 95% confidence interval for the mean. Fish that we were unable to determine a clear angle of orientation for (due to glare in the photos) were omitted from the analysis, resulting in the slightly uneven sample sizes.

**Table S1. Average orientation angle of individual fish.** Data shown are for control or pulsed fish tested under local ambient conditions and during a magnetic-displacement to a southern ocean region.

| <b>Trial#</b> | <b>Treatment</b> | <b>Ambient</b> | <b>Magnetic-displacement</b> |
|---------------|------------------|----------------|------------------------------|
| T1            | Control          | 6.0            | 191.2                        |
| T2            | Pulse            | 52.4           | 135.7                        |
| T3            | Control          | 20.6           | 267.6                        |
| T4            | Pulse            | 227.9          | 55.0                         |
| T5            | Control          | 295.5          | 356.7                        |
| T6            | Pulse            | 70.5           | 215.3                        |
| T7            | Control          | 357.0          | 115.0                        |
| T8            | Pulse            | 266.4          | 118.9                        |
| T9            | Control          | 304.7          | 169.1                        |
| T10           | Pulse            | 53.0           | 11.7                         |
| T11           | Control          | 72.0           | 314.1                        |
| T12           | Pulse            | 199.4          | 163.3                        |
| T13           | Control          | 30.8           | 126.9                        |
| T14           | Pulse            | 294.4          | 50.9                         |
| T15           | Control          | 327.4          | 141.9                        |
| T16           | Pulse            | 24.1           | 54.4                         |
| T17           | Control          | 322.2          | 288.3                        |
| T18           | Pulse            | 26.1           | 336.3                        |
| T19           | Control          | 331.2          | 11.8                         |
| T20           | Pulse            | 300.6          | 15.9                         |
| T21           | Control          | 351.3          | 137.0                        |
| T22           | Pulse            | 312.6          | 114.7                        |
| T23           | Control          | 164.5          | 254.9                        |
| T24           | Pulse            | 54.9           | 90.2                         |
| T25           | Control          | 215.0          | 122.7                        |
| T26           | Pulse            | 321.4          | 38.3                         |
| T27           | Control          | 284.5          | 310.5                        |

**Table S2. Average orientation angle of individual fish.** Data shown are for control or pulsed fish tested under local ambient conditions and during a magnetic-displacement to a southern ocean region.

| Trial # | Treatment | Bucket# | Ambient | Magnetic-displacement |
|---------|-----------|---------|---------|-----------------------|
| T1      | Control   | 1       | 334.3   | 141.7                 |
| T1      | Control   | 2       | 8.1     | 181.9                 |
| T1      | Control   | 3       | 129.4   | 157.5                 |
| T1      | Control   | 4       | 47.8    | 122.8                 |
| T1      | Control   | 5       | NA      | 242.8                 |
| T1      | Control   | 6       | 68.4    | 319.0                 |
| T1      | Control   | 7       | 51.6    | 77.8                  |
| T1      | Control   | 8       | 335.2   | 300.9                 |
| T1      | Control   | 9       | 324.7   | 288.1                 |
| T1      | Control   | 10      | 25.6    | 178.0                 |
| T1      | Control   | 11      | 168.9   | 268.5                 |
| T1      | Control   | 12      | 345.1   | 113.9                 |
| T1      | Control   | 13      | 189.2   | 168.3                 |
| T1      | Control   | 14      | 255.0   | 156.5                 |
| T1      | Control   | 15      | 14.6    | 191.8                 |
| T1      | Control   | 16      | 304.5   | 286.2                 |
| T2      | Pulse     | 1       | 115.8   | 76.3                  |
| T2      | Pulse     | 2       | 286.8   | 250.2                 |
| T2      | Pulse     | 3       | 316.7   | 99.2                  |
| T2      | Pulse     | 4       | 52.2    | 141.1                 |
| T2      | Pulse     | 5       | 346.7   | 313.9                 |
| T2      | Pulse     | 6       | 112.2   | 227.7                 |
| T2      | Pulse     | 7       | 37.7    | 175.5                 |
| T2      | Pulse     | 8       | 337.2   | 322.3                 |
| T2      | Pulse     | 9       | NA      | 230.3                 |
| T2      | Pulse     | 10      | 316.8   | 74.7                  |
| T2      | Pulse     | 11      | 101.5   | 106.0                 |
| T2      | Pulse     | 12      | 161.8   | 188.9                 |
| T2      | Pulse     | 13      | NA      | 258.4                 |
| T2      | Pulse     | 14      | 50.7    | 67.4                  |
| T2      | Pulse     | 15      | 139.5   | 101.3                 |
| T2      | Pulse     | 16      | 83.1    | 74.4                  |
| T3      | Control   | 1       | 257.1   | 278.2                 |
| T3      | Control   | 2       | 319.1   | 347.6                 |
| T3      | Control   | 3       | 28.6    | 278.9                 |
| T3      | Control   | 4       | 51.3    | NA                    |
| T3      | Control   | 5       | 122.0   | 25.6                  |
| T3      | Control   | 6       | 35.3    | 242.4                 |
| T3      | Control   | 7       | 217.8   | 212.1                 |
| T3      | Control   | 8       | 297.6   | 134.5                 |
| T3      | Control   | 9       | 141.1   | 0.6                   |
| T3      | Control   | 10      | 326.9   | 175.5                 |
| T3      | Control   | 11      | 49.0    | 231.1                 |
| T3      | Control   | 12      | NA      | 19.0                  |
| T3      | Control   | 13      | 135.6   | 288.1                 |
| T3      | Control   | 14      | 112.5   | 189.0                 |
| T3      | Control   | 15      | 342.6   | 298.5                 |
| T3      | Control   | 16      | 245.5   | 238.3                 |
| T4      | Pulse     | 1       | 328.1   | 322.7                 |
| T4      | Pulse     | 2       | 42.0    | 6.7                   |
| T4      | Pulse     | 3       | 282.3   | 235.5                 |

|    |         |    |       |       |
|----|---------|----|-------|-------|
| T4 | Pulse   | 4  | 166.0 | 108.3 |
| T4 | Pulse   | 5  | 232.2 | 331.2 |
| T4 | Pulse   | 6  | 211.4 | 46.3  |
| T4 | Pulse   | 7  | 218.8 | 175.5 |
| T4 | Pulse   | 8  | 150.0 | 121.1 |
| T4 | Pulse   | 9  | 203.2 | 149.9 |
| T4 | Pulse   | 10 | 325.2 | 105.3 |
| T4 | Pulse   | 11 | 52.6  | 263.8 |
| T4 | Pulse   | 12 | NA    | 41.9  |
| T4 | Pulse   | 13 | 174.3 | 201.7 |
| T4 | Pulse   | 14 | 76.1  | 358.7 |
| T4 | Pulse   | 15 | 262.7 | 80.7  |
| T4 | Pulse   | 16 | 260.7 | 297.5 |
| T5 | Control | 1  | 342.6 | 227.1 |
| T5 | Control | 2  | 44.0  | 280.1 |
| T5 | Control | 3  | 20.8  | 34.2  |
| T5 | Control | 4  | 20.8  | 350.2 |
| T5 | Control | 5  | 270.0 | 4.5   |
| T5 | Control | 6  | 257.0 | 304.6 |
| T5 | Control | 7  | 184.4 | 332.7 |
| T5 | Control | 8  | 188.1 | 323.2 |
| T5 | Control | 9  | 286.8 | 50.2  |
| T5 | Control | 10 | 53.6  | 149.9 |
| T5 | Control | 11 | 133.1 | 143.3 |
| T5 | Control | 12 | NA    | 290.0 |
| T5 | Control | 13 | 244.2 | 311.9 |
| T5 | Control | 14 | 332.9 | 54.2  |
| T5 | Control | 15 | 214.3 | 61.7  |
| T5 | Control | 16 | NA    | 109.2 |
| T6 | Pulse   | 1  | 204.3 | 232.9 |
| T6 | Pulse   | 2  | 22.1  | 151.1 |
| T6 | Pulse   | 3  | 318.3 | 292.8 |
| T6 | Pulse   | 4  | 83.8  | 48.3  |
| T6 | Pulse   | 5  | 54.0  | 346.4 |
| T6 | Pulse   | 6  | 71.8  | 204.6 |
| T6 | Pulse   | 7  | 140.1 | 322.1 |
| T6 | Pulse   | 8  | 341.1 | 116.4 |
| T6 | Pulse   | 9  | 110.5 | 190.2 |
| T6 | Pulse   | 10 | 86.2  | 123.1 |
| T6 | Pulse   | 11 | 56.0  | 203.5 |
| T6 | Pulse   | 12 | 304.8 | 275.0 |
| T6 | Pulse   | 13 | 190.7 | 326.7 |
| T6 | Pulse   | 14 | 238.5 | 120.8 |
| T6 | Pulse   | 15 | 303.6 | 236.9 |
| T6 | Pulse   | 16 | 183.3 | 202.0 |
| T7 | Control | 1  | 23.2  | 234.3 |
| T7 | Control | 2  | 238.8 | 107.6 |
| T7 | Control | 3  | 82.4  | 27.9  |
| T7 | Control | 4  | 116.1 | 334.7 |
| T7 | Control | 5  | 220.9 | 211.1 |
| T7 | Control | 6  | 251.5 | 121.1 |
| T7 | Control | 7  | 103.3 | 289.9 |

|     |         |    |       |       |
|-----|---------|----|-------|-------|
| T7  | Control | 8  | 164.0 | 93.7  |
| T7  | Control | 9  | 335.0 | 96.6  |
| T7  | Control | 10 | 1.5   | 174.0 |
| T7  | Control | 11 | 3.9   | 52.1  |
| T7  | Control | 12 | NA    | 15.4  |
| T7  | Control | 13 | 290.8 | 252.6 |
| T7  | Control | 14 | 1.9   | 160.8 |
| T7  | Control | 15 | 248.0 | 248.8 |
| T7  | Control | 16 | 94.3  | 69.7  |
| T8  | Pulse   | 1  | 133.7 | 88.9  |
| T8  | Pulse   | 2  | 54.0  | 319.9 |
| T8  | Pulse   | 3  | 199.3 | 184.9 |
| T8  | Pulse   | 4  | 191.6 | 127.5 |
| T8  | Pulse   | 5  | 113.9 | 48.0  |
| T8  | Pulse   | 6  | 260.8 | 10.7  |
| T8  | Pulse   | 7  | 320.1 | 129.2 |
| T8  | Pulse   | 8  | 3.5   | 82.9  |
| T8  | Pulse   | 9  | NA    | 157.7 |
| T8  | Pulse   | 10 | 284.5 | 60.6  |
| T8  | Pulse   | 11 | 161.9 | 264.6 |
| T8  | Pulse   | 12 | 36.1  | NA    |
| T8  | Pulse   | 13 | 274.2 | 291.7 |
| T8  | Pulse   | 14 | 331.2 | 193.4 |
| T8  | Pulse   | 15 | 301.0 | 119.4 |
| T8  | Pulse   | 16 | 205.6 | 257.5 |
| T9  | Control | 1  | NA    | NA    |
| T9  | Control | 2  | 295.5 | 156.6 |
| T9  | Control | 3  | 358.2 | 194.8 |
| T9  | Control | 4  | 177.5 | 178.1 |
| T9  | Control | 5  | NA    | 291.7 |
| T9  | Control | 6  | 282.3 | 215.3 |
| T9  | Control | 7  | 72.5  | 23.7  |
| T9  | Control | 8  | 24.9  | NA    |
| T9  | Control | 9  | 269.0 | 91.1  |
| T9  | Control | 10 | 114.6 | 305.9 |
| T9  | Control | 11 | 297.7 | 195.6 |
| T9  | Control | 12 | 263.4 | 43.9  |
| T9  | Control | 13 | 355.1 | 323.1 |
| T9  | Control | 14 | 168.7 | 156.1 |
| T9  | Control | 15 | 97.3  | 117.7 |
| T9  | Control | 16 | 268.8 | 161.3 |
| T10 | Pulse   | 1  | 199.7 | 61.9  |
| T10 | Pulse   | 2  | 45.5  | 6.4   |
| T10 | Pulse   | 3  | 65.5  | 69.6  |
| T10 | Pulse   | 4  | 46.0  | 145.4 |
| T10 | Pulse   | 5  | 251.6 | 230.5 |
| T10 | Pulse   | 6  | 38.7  | 331.3 |
| T10 | Pulse   | 7  | 139.3 | 160.4 |
| T10 | Pulse   | 8  | 194.4 | 355.8 |
| T10 | Pulse   | 9  | 333.5 | 355.5 |
| T10 | Pulse   | 10 | 330.4 | 87.4  |
| T10 | Pulse   | 11 | 57.0  | 12.4  |

|     |         |    |       |       |
|-----|---------|----|-------|-------|
| T10 | Pulse   | 12 | 138.6 | 299.4 |
| T10 | Pulse   | 13 | 140.7 | 311.5 |
| T10 | Pulse   | 14 | 36.0  | 333.0 |
| T10 | Pulse   | 15 | 277.0 | 42.4  |
| T10 | Pulse   | 16 | 275.3 | 12.8  |
| T11 | Control | 1  | 349.1 | 146.5 |
| T11 | Control | 2  | 258.6 | 322.1 |
| T11 | Control | 3  | 114.0 | 86.0  |
| T11 | Control | 4  | 138.8 | 12.8  |
| T11 | Control | 5  | 101.8 | 230.8 |
| T11 | Control | 6  | 111.6 | 196.1 |
| T11 | Control | 7  | 230.2 | 245.2 |
| T11 | Control | 8  | 98.5  | 205.6 |
| T11 | Control | 9  | 277.0 | 208.7 |
| T11 | Control | 10 | 54.5  | 17.1  |
| T11 | Control | 11 | 60.3  | 30.8  |
| T11 | Control | 12 | 45.8  | 64.4  |
| T11 | Control | 13 | 34.6  | 289.7 |
| T11 | Control | 14 | 57.9  | 279.4 |
| T11 | Control | 15 | 76.8  | 7.9   |
| T11 | Control | 16 | 269.4 | 99.2  |
| T12 | Pulse   | 1  | 160.1 | 314.8 |
| T12 | Pulse   | 2  | 303.0 | 176.2 |
| T12 | Pulse   | 3  | 218.5 | 74.9  |
| T12 | Pulse   | 4  | 132.3 | 78.7  |
| T12 | Pulse   | 5  | 211.3 | 354.0 |
| T12 | Pulse   | 6  | 167.4 | 188.8 |
| T12 | Pulse   | 7  | 6.1   | 89.3  |
| T12 | Pulse   | 8  | 103.5 | 216.2 |
| T12 | Pulse   | 9  | 255.4 | 146.3 |
| T12 | Pulse   | 10 | 214.0 | 281.0 |
| T12 | Pulse   | 11 | 298.5 | 183.1 |
| T12 | Pulse   | 12 | 349.5 | 133.9 |
| T12 | Pulse   | 13 | 52.5  | 338.7 |
| T12 | Pulse   | 14 | 116.6 | 326.3 |
| T12 | Pulse   | 15 | 181.7 | 277.5 |
| T12 | Pulse   | 16 | 237.5 | 132.4 |
| T13 | Control | 1  | 49.3  | 97.8  |
| T13 | Control | 2  | 331.8 | 150.4 |
| T13 | Control | 3  | 194.2 | 50.4  |
| T13 | Control | 4  | 75.6  | 73.2  |
| T13 | Control | 5  | 91.4  | 188.5 |
| T13 | Control | 6  | 284.7 | 250.3 |
| T13 | Control | 7  | 127.1 | 40.1  |
| T13 | Control | 8  | 7.3   | 121.9 |
| T13 | Control | 9  | 11.2  | 226.4 |
| T13 | Control | 10 | 127.6 | 144.7 |
| T13 | Control | 11 | 283.7 | 238.7 |
| T13 | Control | 12 | 53.6  | 76.3  |
| T13 | Control | 13 | 28.8  | 130.4 |
| T13 | Control | 14 | 156.7 | 164.2 |
| T13 | Control | 15 | 323.4 | 312.8 |

|     |         |    |       |       |
|-----|---------|----|-------|-------|
| T13 | Control | 16 | 327.0 | 75.7  |
| T14 | Pulse   | 1  | 68.3  | 352.9 |
| T14 | Pulse   | 2  | 234.0 | 3.8   |
| T14 | Pulse   | 3  | 248.4 | 348.8 |
| T14 | Pulse   | 4  | 291.2 | 166.0 |
| T14 | Pulse   | 5  | NA    | NA    |
| T14 | Pulse   | 6  | 122.1 | 74.0  |
| T14 | Pulse   | 7  | 154.4 | 96.1  |
| T14 | Pulse   | 8  | 328.3 | 138.3 |
| T14 | Pulse   | 9  | 325.6 | 270.0 |
| T14 | Pulse   | 10 | 106.6 | 235.5 |
| T14 | Pulse   | 11 | 249.5 | 356.6 |
| T14 | Pulse   | 12 | 10.3  | 54.1  |
| T14 | Pulse   | 13 | NA    | 22.1  |
| T14 | Pulse   | 14 | 101.2 | 261.5 |
| T14 | Pulse   | 15 | 19.2  | 144.0 |
| T14 | Pulse   | 16 | 202.1 | 117.6 |
| T15 | Control | 1  | 182.0 | 8.3   |
| T15 | Control | 2  | 323.4 | 51.1  |
| T15 | Control | 3  | 235.0 | 59.8  |
| T15 | Control | 4  | 309.8 | 127.0 |
| T15 | Control | 5  | 292.1 | 151.3 |
| T15 | Control | 6  | 157.4 | 258.9 |
| T15 | Control | 7  | 23.3  | 313.5 |
| T15 | Control | 8  | 289.9 | 116.4 |
| T15 | Control | 9  | NA    | 316.8 |
| T15 | Control | 10 | 51.0  | 162.7 |
| T15 | Control | 11 | 101.0 | 139.2 |
| T15 | Control | 12 | 63.5  | 230.4 |
| T15 | Control | 13 | 303.6 | 279.4 |
| T15 | Control | 14 | 111.0 | 58.1  |
| T15 | Control | 15 | 356.5 | 153.9 |
| T15 | Control | 16 | 260.8 | 208.3 |
| T16 | Pulse   | 1  | 360.0 | 61.0  |
| T16 | Pulse   | 2  | 347.0 | 5.3   |
| T16 | Pulse   | 3  | 237.5 | 81.9  |
| T16 | Pulse   | 4  | 77.1  | 41.4  |
| T16 | Pulse   | 5  | 285.9 | 98.6  |
| T16 | Pulse   | 6  | 145.3 | 197.6 |
| T16 | Pulse   | 7  | 96.8  | 123.6 |
| T16 | Pulse   | 8  | 78.3  | 352.2 |
| T16 | Pulse   | 9  | 345.6 | 21.3  |
| T16 | Pulse   | 10 | 94.7  | 37.9  |
| T16 | Pulse   | 11 | 3.6   | 250.0 |
| T16 | Pulse   | 12 | 32.7  | 210.3 |
| T16 | Pulse   | 13 | 50.0  | 11.9  |
| T16 | Pulse   | 14 | 4.7   | 352.0 |
| T16 | Pulse   | 15 | 274.9 | 189.5 |
| T16 | Pulse   | 16 | 15.3  | 91.4  |
| T17 | Control | 1  | 284.7 | 337.4 |
| T17 | Control | 2  | 1.4   | 207.7 |
| T17 | Control | 3  | 12.2  | 142.2 |

|     |         |    |       |       |
|-----|---------|----|-------|-------|
| T17 | Control | 4  | 275.1 | 315.0 |
| T17 | Control | 5  | 237.2 | 195.0 |
| T17 | Control | 6  | 174.5 | 173.7 |
| T17 | Control | 7  | 10.5  | 239.1 |
| T17 | Control | 8  | 213.7 | 35.6  |
| T17 | Control | 9  | 67.1  | 246.7 |
| T17 | Control | 10 | 322.8 | 271.7 |
| T17 | Control | 11 | 332.4 | 35.9  |
| T17 | Control | 12 | 8.3   | 31.7  |
| T17 | Control | 13 | 58.4  | 238.7 |
| T17 | Control | 14 | NA    | 350.3 |
| T17 | Control | 15 | 275.4 | 36.1  |
| T17 | Control | 16 | 169.9 | NA    |
| T18 | Pulse   | 1  | 2.4   | 284.8 |
| T18 | Pulse   | 2  | 333.7 | 179.5 |
| T18 | Pulse   | 3  | 143.4 | 116.5 |
| T18 | Pulse   | 4  | 122.1 | 103.3 |
| T18 | Pulse   | 5  | 58.9  | 27.9  |
| T18 | Pulse   | 6  | 243.1 | 247.0 |
| T18 | Pulse   | 7  | 61.4  | 164.7 |
| T18 | Pulse   | 8  | 70.3  | 149.4 |
| T18 | Pulse   | 9  | 308.9 | 321.5 |
| T18 | Pulse   | 10 | 298.5 | 40.1  |
| T18 | Pulse   | 11 | 310.1 | 313.6 |
| T18 | Pulse   | 12 | 60.2  | 346.1 |
| T18 | Pulse   | 13 | 208.6 | 353.8 |
| T18 | Pulse   | 14 | 44.1  | 28.4  |
| T18 | Pulse   | 15 | 31.0  | 234.7 |
| T18 | Pulse   | 16 | 33.6  | 302.5 |
| T19 | Control | 1  | 352.1 | 240.6 |
| T19 | Control | 2  | 187.9 | 36.2  |
| T19 | Control | 3  | 51.5  | 71.7  |
| T19 | Control | 4  | 302.5 | 78.7  |
| T19 | Control | 5  | 70.9  | 301.9 |
| T19 | Control | 6  | 348.3 | 278.0 |
| T19 | Control | 7  | 341.8 | 277.9 |
| T19 | Control | 8  | 16.1  | 98.6  |
| T19 | Control | 9  | 128.0 | 250.7 |
| T19 | Control | 10 | 244.7 | 8.2   |
| T19 | Control | 11 | 253.5 | 48.6  |
| T19 | Control | 12 | 76.5  | 302.5 |
| T19 | Control | 13 | 347.8 | 246.7 |
| T19 | Control | 14 | 287.3 | 130.5 |
| T19 | Control | 15 | 303.8 | 144.0 |
| T19 | Control | 16 | 223.7 | 120.7 |
| T20 | Pulse   | 1  | NA    | 305.1 |
| T20 | Pulse   | 2  | 133.9 | 147.6 |
| T20 | Pulse   | 3  | 295.8 | 51.5  |
| T20 | Pulse   | 4  | 117.3 | 267.4 |
| T20 | Pulse   | 5  | 180.0 | 145.9 |
| T20 | Pulse   | 6  | 131.9 | 72.8  |
| T20 | Pulse   | 7  | 3.5   | 3.5   |



|     |         |    |       |       |
|-----|---------|----|-------|-------|
| T20 | Pulse   | 8  | 34.4  | 22.2  |
| T20 | Pulse   | 9  | 270.5 | 202.2 |
| T20 | Pulse   | 10 | 245.3 | 16.9  |
| T20 | Pulse   | 11 | 291.2 | 294.2 |
| T20 | Pulse   | 12 | 277.2 | 337.8 |
| T20 | Pulse   | 13 | 305.7 | 26.3  |
| T20 | Pulse   | 14 | 17.7  | 322.3 |
| T20 | Pulse   | 15 | 314.9 | 41.2  |
| T20 | Pulse   | 16 | NA    | 121.8 |
| T21 | Control | 1  | NA    | 50.5  |
| T21 | Control | 2  | 76.1  | 241.2 |
| T21 | Control | 3  | 2.6   | 245.6 |
| T21 | Control | 4  | 82.2  | 185.9 |
| T21 | Control | 5  | 249.4 | 216.0 |
| T21 | Control | 6  | 302.0 | 335.6 |
| T21 | Control | 7  | 51.1  | 190.3 |
| T21 | Control | 8  | NA    | 12.9  |
| T21 | Control | 9  | 119.4 | 88.9  |
| T21 | Control | 10 | 222.3 | 98.4  |
| T21 | Control | 11 | 333.9 | 126.8 |
| T21 | Control | 12 | 326.2 | 60.4  |
| T21 | Control | 13 | 8.8   | 200.7 |
| T21 | Control | 14 | 179.3 | 90.8  |
| T21 | Control | 15 | 221.4 | 310.0 |
| T21 | Control | 16 | NA    | 322.0 |
| T22 | Pulse   | 1  | 6.7   | 111.8 |
| T22 | Pulse   | 2  | 319.9 | 12.3  |
| T22 | Pulse   | 3  | 212.8 | 52.4  |
| T22 | Pulse   | 4  | 255.9 | 33.2  |
| T22 | Pulse   | 5  | 290.8 | 342.9 |
| T22 | Pulse   | 6  | 245.2 | 171.2 |
| T22 | Pulse   | 7  | 311.5 | 258.1 |
| T22 | Pulse   | 8  | NA    | 240.6 |
| T22 | Pulse   | 9  | 97.4  | 185.2 |
| T22 | Pulse   | 10 | 32.6  | 171.0 |
| T22 | Pulse   | 11 | 304.1 | 27.2  |
| T22 | Pulse   | 12 | NA    | 123.9 |
| T22 | Pulse   | 13 | 77.6  | 85.0  |
| T22 | Pulse   | 14 | 27.4  | 122.0 |
| T22 | Pulse   | 15 | 219.9 | 171.7 |
| T22 | Pulse   | 16 | NA    | NA    |
| T23 | Control | 1  | 87.1  | 286.2 |
| T23 | Control | 2  | 198.3 | 67.3  |
| T23 | Control | 3  | 275.2 | 307.3 |
| T23 | Control | 4  | 76.4  | 29.7  |
| T23 | Control | 5  | 97.2  | 231.1 |
| T23 | Control | 6  | 268.8 | 45.5  |
| T23 | Control | 7  | 84.9  | 198.4 |
| T23 | Control | 8  | NA    | NA    |
| T23 | Control | 9  | 170.5 | 244.6 |
| T23 | Control | 10 | 110.0 | 264.4 |
| T23 | Control | 11 | 240.5 | 235.1 |

|     |         |    |       |       |
|-----|---------|----|-------|-------|
| T23 | Control | 12 | 235.5 | 179.7 |
| T23 | Control | 13 | 242.1 | 228.9 |
| T23 | Control | 14 | 266.7 | 280.4 |
| T23 | Control | 15 | 72.1  | 250.5 |
| T23 | Control | 16 | 116.5 | NA    |
| T24 | Pulse   | 1  | 8.1   | 59.9  |
| T24 | Pulse   | 2  | 106.0 | 58.1  |
| T24 | Pulse   | 3  | 118.1 | 19.3  |
| T24 | Pulse   | 4  | 184.1 | 165.8 |
| T24 | Pulse   | 5  | 30.0  | NA    |
| T24 | Pulse   | 6  | 35.5  | 121.7 |
| T24 | Pulse   | 7  | 9.4   | 148.7 |
| T24 | Pulse   | 8  | 291.4 | 26.2  |
| T24 | Pulse   | 9  | 332.3 | 140.7 |
| T24 | Pulse   | 10 | 209.0 | 35.3  |
| T24 | Pulse   | 11 | 280.3 | 26.6  |
| T24 | Pulse   | 12 | 110.1 | 209.9 |
| T24 | Pulse   | 13 | 128.2 | 263.5 |
| T24 | Pulse   | 14 | 66.5  | 131.5 |
| T24 | Pulse   | 15 | 292.1 | 127.0 |
| T24 | Pulse   | 16 | 100.2 | 319.9 |
| T25 | Control | 1  | 67.1  | 308.6 |
| T25 | Control | 2  | 290.2 | 91.4  |
| T25 | Control | 3  | 247.3 | 29.6  |
| T25 | Control | 4  | 78.6  | NA    |
| T25 | Control | 5  | 202.6 | 221.2 |
| T25 | Control | 6  | 58.6  | 138.8 |
| T25 | Control | 7  | 250.4 | 3.3   |
| T25 | Control | 8  | NA    | 21.1  |
| T25 | Control | 9  | 177.5 | 110.1 |
| T25 | Control | 10 | 284.7 | 297.3 |
| T25 | Control | 11 | 77.5  | 112.3 |
| T25 | Control | 12 | 202.6 | NA    |
| T25 | Control | 13 | 227.0 | 180.8 |
| T25 | Control | 14 | 222.0 | 168.9 |
| T25 | Control | 15 | NA    | 121.9 |
| T25 | Control | 16 | 214.4 | 195.3 |
| T26 | Pulse   | 1  | 314.4 | 21.1  |
| T26 | Pulse   | 2  | 293.5 | 317.1 |
| T26 | Pulse   | 3  | 313.9 | 151.2 |
| T26 | Pulse   | 4  | 342.4 | 36.8  |
| T26 | Pulse   | 5  | 22.0  | 220.4 |
| T26 | Pulse   | 6  | 176.4 | 168.7 |
| T26 | Pulse   | 7  | 299.2 | 206.4 |
| T26 | Pulse   | 8  | 122.6 | 18.0  |
| T26 | Pulse   | 9  | 313.6 | 172.7 |
| T26 | Pulse   | 10 | 53.6  | 351.0 |
| T26 | Pulse   | 11 | 250.0 | 241.3 |
| T26 | Pulse   | 12 | 316.4 | 93.7  |
| T26 | Pulse   | 13 | 336.8 | 337.5 |
| T26 | Pulse   | 14 | 265.9 | 154.8 |
| T26 | Pulse   | 15 | 18.9  | 31.2  |

|     |         |    |       |       |
|-----|---------|----|-------|-------|
| T26 | Pulse   | 16 | NA    | 7.9   |
| T27 | Control | 1  | 215.1 | 147.7 |
| T27 | Control | 2  | 308.5 | 206.0 |
| T27 | Control | 3  | 338.6 | 338.1 |
| T27 | Control | 4  | 242.8 | 127.3 |
| T27 | Control | 5  | 125.3 | 7.5   |
| T27 | Control | 6  | 155.3 | 69.9  |
| T27 | Control | 7  | 60.3  | 332.6 |
| T27 | Control | 8  | 285.6 | 284.7 |
| T27 | Control | 9  | 283.4 | 302.8 |
| T27 | Control | 10 | 28.3  | 288.8 |
| T27 | Control | 11 | 301.1 | 340.4 |
| T27 | Control | 12 | NA    | 78.7  |
| T27 | Control | 13 | 280.1 | 136.5 |
| T27 | Control | 14 | 175.2 | 305.5 |
| T27 | Control | 15 | 263.8 | 183.6 |
| T27 | Control | 16 | 35.3  | 266.5 |

NA =instances when capturing fish orientation was not possible.
